# Supplementary material for: Design, Synthesis, and In Vitro, In Silico and In Cellulo Evaluation of New Pyrimidine and Pyridine Amide and Carbamate Derivatives as Multi-Functional Cholinesterase Inhibitors
Source: Pharmaceuticals (Basel). 2022 May 27;15(6):673. doi: 10.3390/ph15060673 (PMC9227096; doi:10.3390/ph15060673)
Supplement: Supplementary file 1 [file pharmaceuticals-15-00673-s001.zip › pharmaceuticals-1723520-supplementary.pdf]

# Design, Synthesis, and In Vitro, In Silico and In Cellulo Evaluation of New Pyrimidine and Pyridine Amide and Carbamate Derivatives as Multi-Functional Cholinesterase Inhibitors

Martina Bortolami <sup>1</sup>, Fabiana Pandolfi <sup>1</sup>, Valeria Tudino <sup>2</sup>, Antonella Messori <sup>2</sup>, Valentina Noemi Madia <sup>2</sup>, Daniela De Vita <sup>3</sup>, Roberto Di Santo <sup>2,4</sup>, Roberta Costi <sup>2,4</sup>, Isabella Romeo <sup>5,6</sup>, Stefano Alcaro <sup>5,6,\*</sup>, Marisa Colone <sup>7</sup>, Annarita Stringaro <sup>7</sup>, Alba Espargaró <sup>8,9</sup>, Raimon Sabatè <sup>8,9</sup> and Luigi Scipione <sup>2,\*</sup>

<sup>1</sup> Department of Scienze di Base e Applicate per l'Ingegneria, Sapienza University of Rome, Via Castro Laurenziano 7, 00185 Rome, Italy; martina.bortolami@uniroma1.it (M.B.); fabiana.pandolfi@uniroma1.it (F.P.)

<sup>2</sup> Department of Chimica e Tecnologia del Farmaco, Sapienza University of Rome, Piazzale Aldo Moro 5, 00185 Rome, Italy; valeria.tudino@uniroma1.it (V.T.); antonella.messori@uniroma1.it (A.M.); valentinanoemi.madia@uniroma1.it (V.N.M.)

<sup>3</sup> Department of Environmental Biology, Sapienza University of Rome, Piazzale Aldo Moro 5, 00185 Rome, Italy; daniela.devita@uniroma1.it

<sup>4</sup> Istituto Pasteur, Fondazione Cenci Bolognetti, Sapienza University of Rome, Piazzale Aldo Moro 5, 00185 Rome, Italy; roberto.disanto@uniroma1.it (R.D.S.); roberta.costi@uniroma1.it (R.C.)

<sup>5</sup> Net4Science Academic Spin-Off, Università degli Studi "Magna Græcia" di Catanzaro, Campus "S. Venuta", Viale Europa, 88100 Catanzaro, Italy;

<sup>6</sup> Dipartimento di Scienze della Salute, Università degli Studi "Magna Græcia" di Catanzaro, 88100 Catanzaro, Italy; isabella.romeo@unicz.it

<sup>7</sup> National Center for Drug Research and Evaluation, Istituto Superiore di Sanità, 00161 Rome, Italy; marisa.colone@iss.it (M.C.); annarita.stringaro@iss.it (A.S.)

<sup>8</sup> Department of Pharmacy and Pharmaceutical Technology and Physical-Chemistry, Faculty of Pharmacy and Food Sciences, University of Barcelona, 27-31 Barcelona, Catalonia, Spain ;

<sup>9</sup> Institute of Nanoscience and Nanotechnology (IN<sup>2</sup>UB), 08028 Barcelona, Spain; aespargar@ub.edu (A.E.); rsabate@ub.edu (R.S.)

\* Correspondence: alcaro@unicz.it (SA); luigi.scipione@uniroma1.it (LS).

## SUPPORTING INFORMATION

|                                                                 |        |
|-----------------------------------------------------------------|--------|
| Dixon's plot of compounds 12 and 14 towards <i>eqBChE</i>       | pag. 2 |
| IC <sub>50</sub> graph of compound 18 towards <i>eqBChE</i>     | pag. 3 |
| <i>In silico</i> studies                                        | pag. 4 |
| UV-Vis titration spectra and Job's plots for selected compounds | pag. 7 |

### Dixon's plot of compounds **12** and **14** towards *eq*BChE

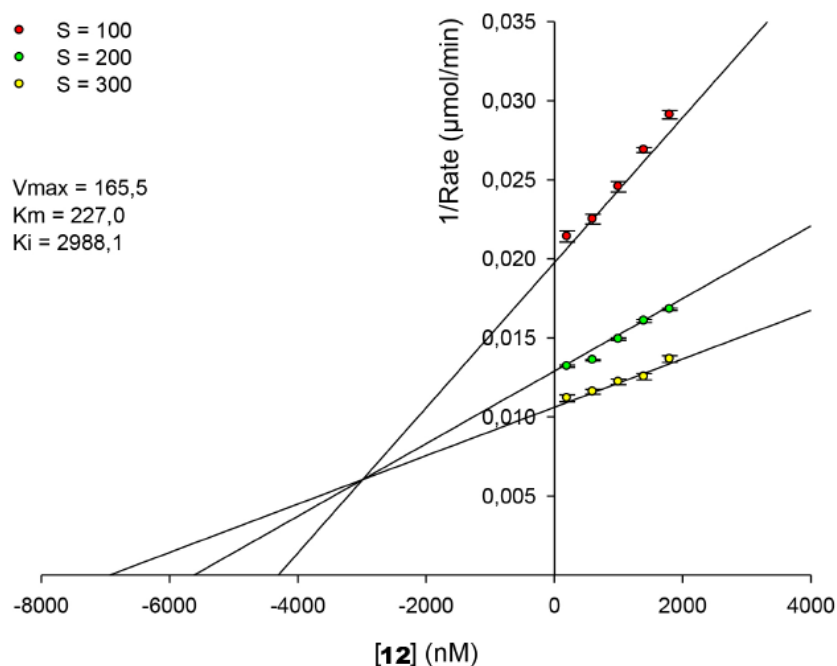

**Figure S1.** Dixon's plot obtained for **12** (200-1800 nM), in presence of *eq*BChE (0.0833 U/mL) and ASCh (100-300  $\mu\text{M}$ ). Competitive inhibition mechanism was observed ( $K_i = 2.988 \pm 0.190 \mu\text{M}$ ,  $R^2 = 0.987$ ).

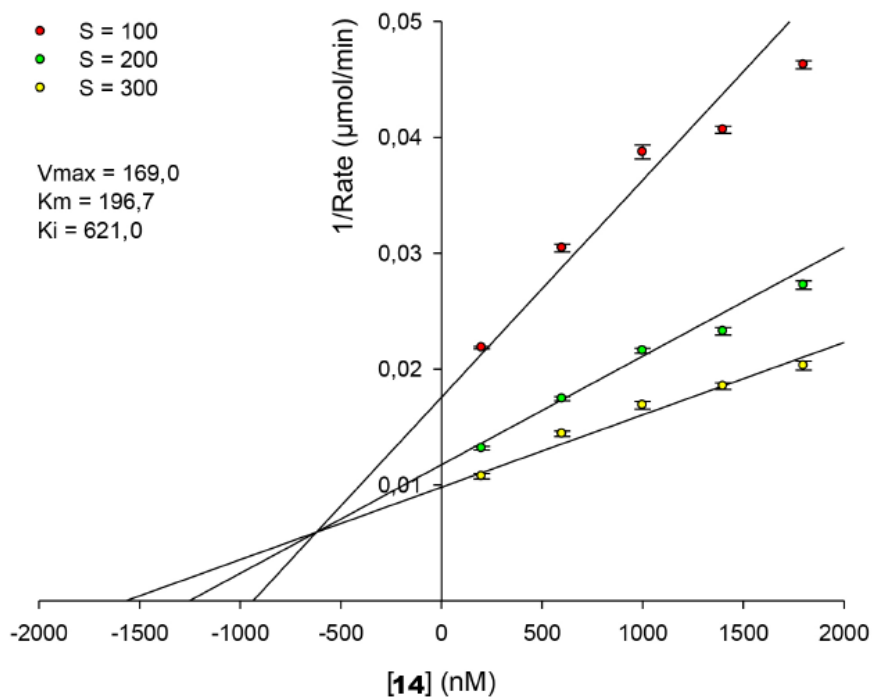

**Figure S2.** Dixon's plot obtained for **14** (200-1800 nM), in presence of *eq*BChE (0.0833 U/mL) and ASCh (100-300  $\mu\text{M}$ ). Competitive inhibition mechanism was observed ( $K_i = 0.621 \pm 0.043 \mu\text{M}$ ,  $R^2 = 0.980$ ).

### IC<sub>50</sub> graph of compound **18** towards *eq*BChE

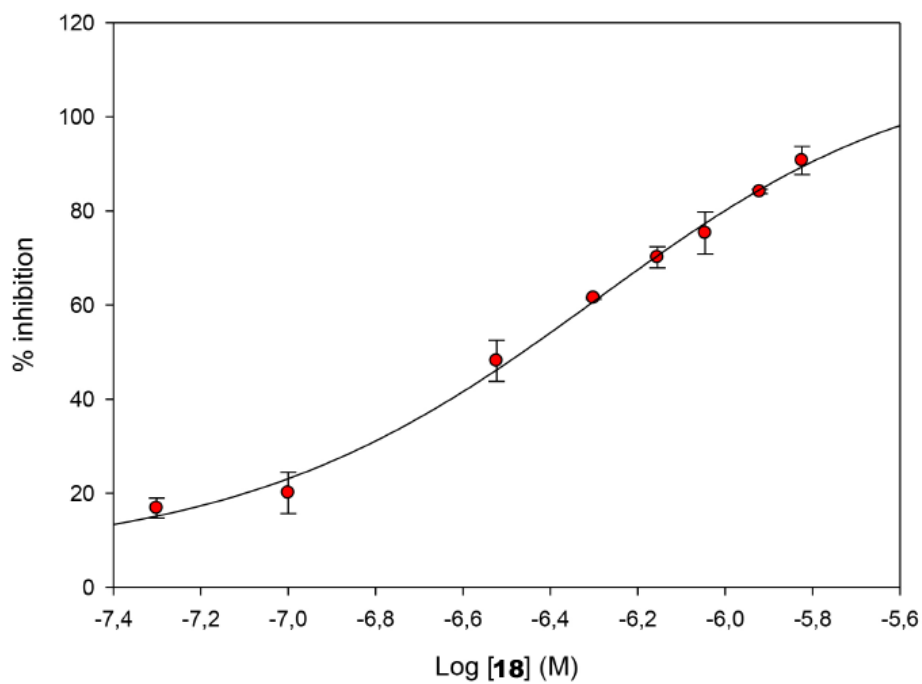

**Figure S3.** IC<sub>50</sub> graph for compound **18** (50-1500 nM), in presence of *eq*BChE (0.0833 U/mL) and ACh (100 μM). The IC<sub>50</sub> value extrapolated from the graph is 454 ± 82 nM.

## In silico studies

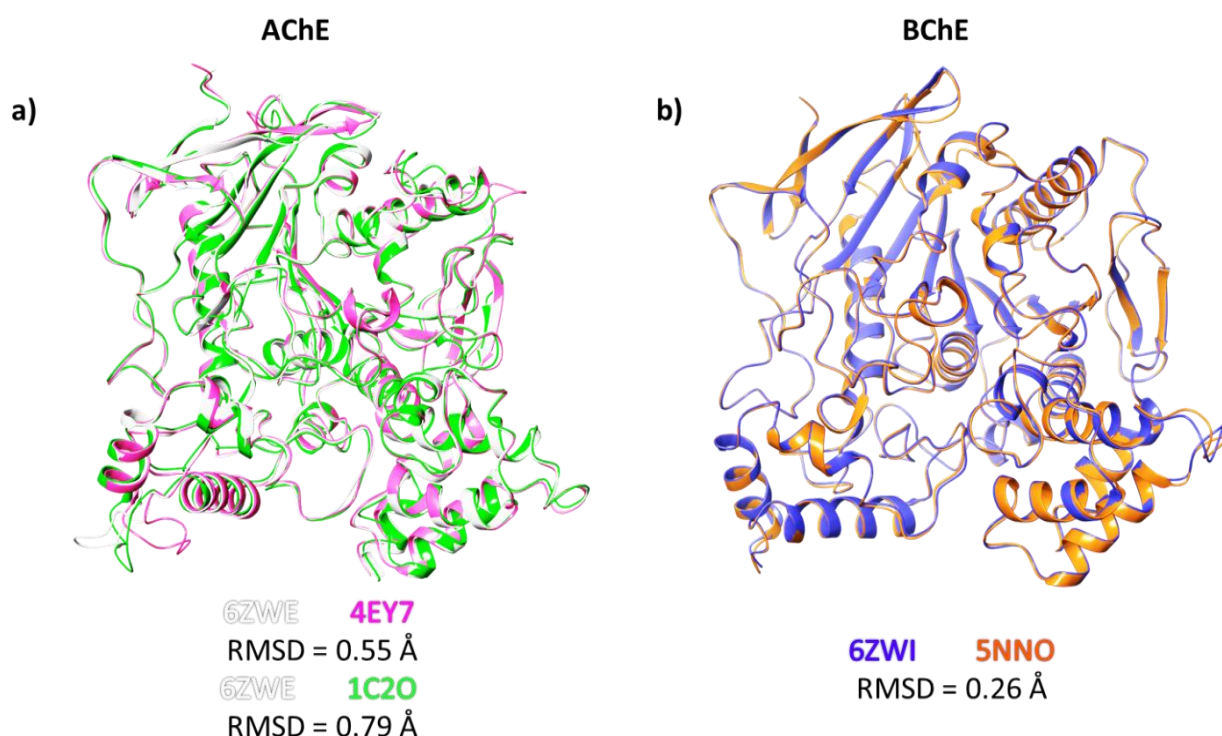

**Figure S4.** a) Superposition of *Electrophorus electricus* AChE (PDB code: 1C2O) and human AChE (PDB code: 4EY7) with human AChE (PDB code: 6ZWE) and b) superposition of human BChE (PDB code: 5NNO) and human BChE (PDB code: 6ZWI) generated by Protein Structure Alignment.

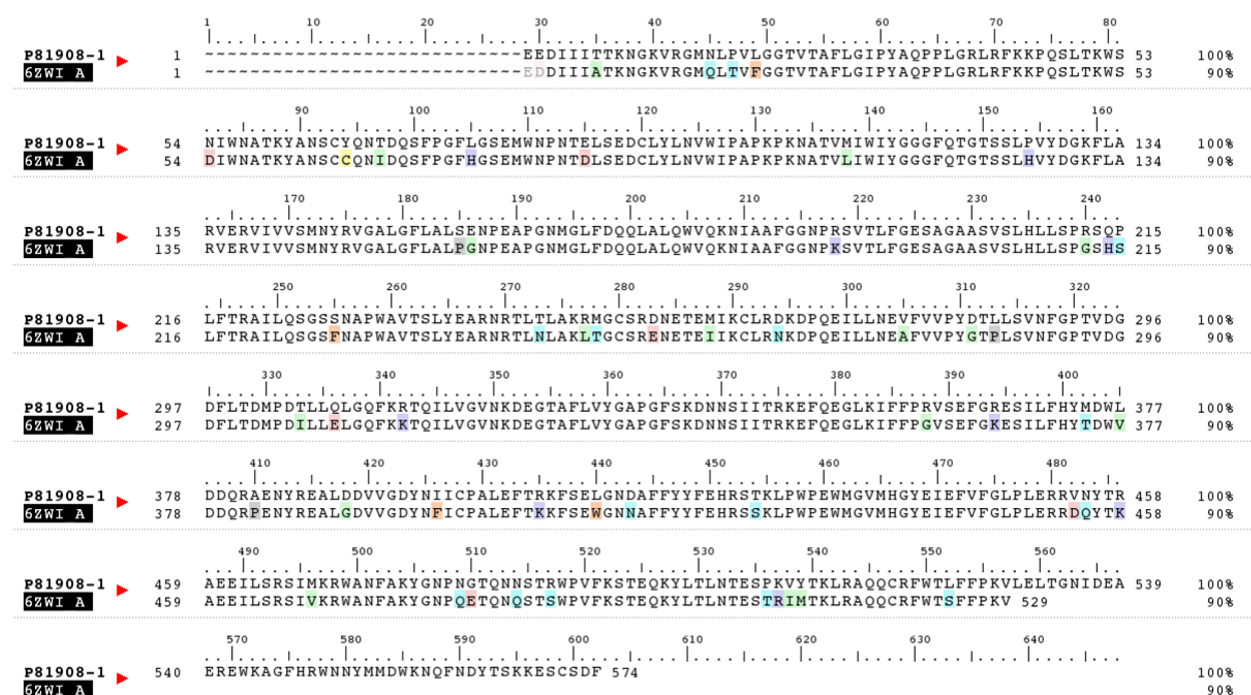

**Figure S5.** Sequence alignment of equine BChE (entry BuCE\_Ecuus, P81908) with human BChE (PDB code: 6ZWI) generated by ClustalW algorithm. Among the sequence, only the different residues are coloured. The percentage identity of the aligned sequence to the selected model is reported.

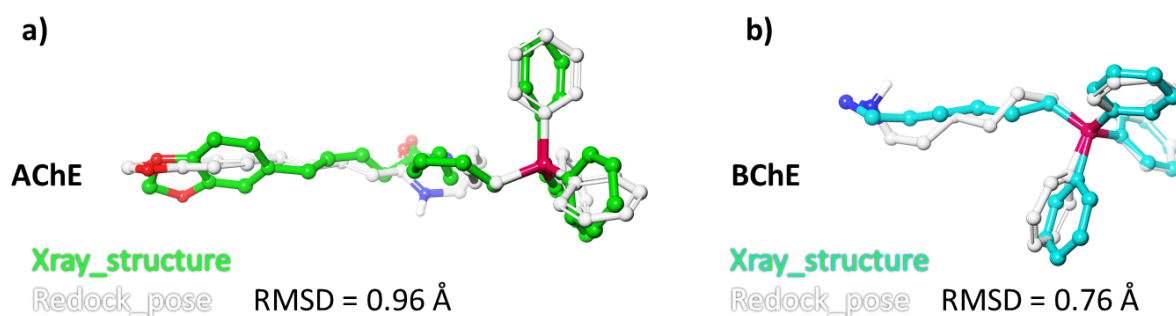

**Figure S6.** Superimposition of the re-docked pose (gray carbons) and co-crystallized ligand of **a)** *hAChE* and **b)** *hBChE* receptors, represented, respectively, in green and blue carbons. RMSD was found to be 0.96 Å for *hAChE* ligand and 0.76 Å for *hBChE* ligand.

**Table S1.** GlideScore values (Kcal/mol) of compounds **3-19** for binding *hAChE* and *hBChE* and re-docking values of co-crystallized ligands of 6ZWE and 6ZWI PDB structures.

| Compound                           |             | GlideScore<br>(Kcal/mol) |              |
|------------------------------------|-------------|--------------------------|--------------|
|                                    |             | <i>hAChE</i>             | <i>hBChE</i> |
| Pyrimidine<br>amide<br>derivatives | <b>3</b>    | -6.37                    | -6.61        |
|                                    | <b>4</b>    | -7.87                    | -7.31        |
|                                    | <b>5</b>    | -8.02                    | -7.81        |
|                                    | <b>6</b>    | -8.04                    | -7.78        |
|                                    | <b>7</b>    | -7.68                    | -7.82        |
|                                    | <b>8</b>    | -7.87                    | -7.76        |
|                                    | <b>9</b>    | -8.07                    | -7.55        |
|                                    | <b>10</b>   | -6.18                    | -5.54        |
| Pyridine amide<br>derivatives      | <b>11</b>   | -8.77                    | -8.24        |
|                                    | <b>12</b>   | -6.38                    | -6.68        |
|                                    | <b>13</b>   | -8.23                    | -7.67        |
|                                    | <b>14</b>   | -8.05                    | -8.13        |
| Carbamate<br>derivatives           | <b>15</b>   | -8.22                    | -8.46        |
|                                    | <b>16</b>   | -7.31                    | -7.90        |
|                                    | <b>17</b>   | -7.31                    | -7.10        |
|                                    | <b>18</b>   | -7.59                    | -8.49        |
| X-ray ligand                       | <b>19</b>   | -7.65                    | -7.67        |
|                                    | <b>6ZWE</b> | -10.78                   | -            |
|                                    | <b>6ZWI</b> | -                        | -7.71        |

**Table S2.** Molecular Surface Area ( $\text{\AA}^3$ ) of the best docking poses of the **3-19** compounds into AChE and BChE binding pocket.

| Compound      | Molecular Surface Area ( $\text{\AA}^3$ ) |        |
|---------------|-------------------------------------------|--------|
|               | AChE                                      | BChE   |
| 3             | 313.06                                    | 320.23 |
| 4             | 332.09                                    | 341.92 |
| 5             | 414.72                                    | 429.86 |
| 6             | 343.74                                    | 354.38 |
| 7             | 338.51                                    | 342.67 |
| 8             | 334.57                                    | 343.06 |
| 9             | 337.76                                    | 348.65 |
| 10            | 317.98                                    | 319.84 |
| 11            | 343.61                                    | 356.03 |
| 12            | 316.54                                    | 335.67 |
| 13            | 341.36                                    | 346.47 |
| 14            | 409.92                                    | 436.15 |
| 15            | 332.62                                    | 359.54 |
| 16            | 320.26                                    | 333.34 |
| 17            | 349.98                                    | 356.32 |
| 18            | 335.73                                    | 336.52 |
| 19            | 341.99                                    | 359.64 |
| Average value | 342.56                                    | 354.13 |

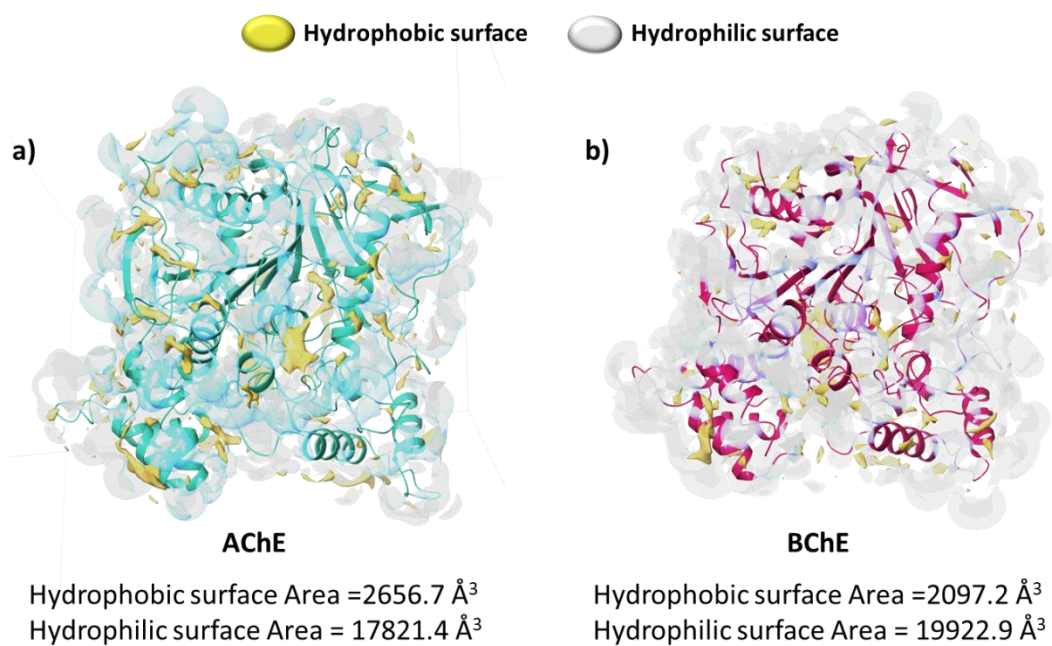

**Figure S7.** Views of Hydrophobic and Hydrophilic surface area in yellow and grey solid surface, respectively, of **a)** *hAChE* (turquoise cartoon) and **b)** *hBChE* receptors (pink cartoon).

## UV-Vis titration spectra and Job's plots for selected compounds

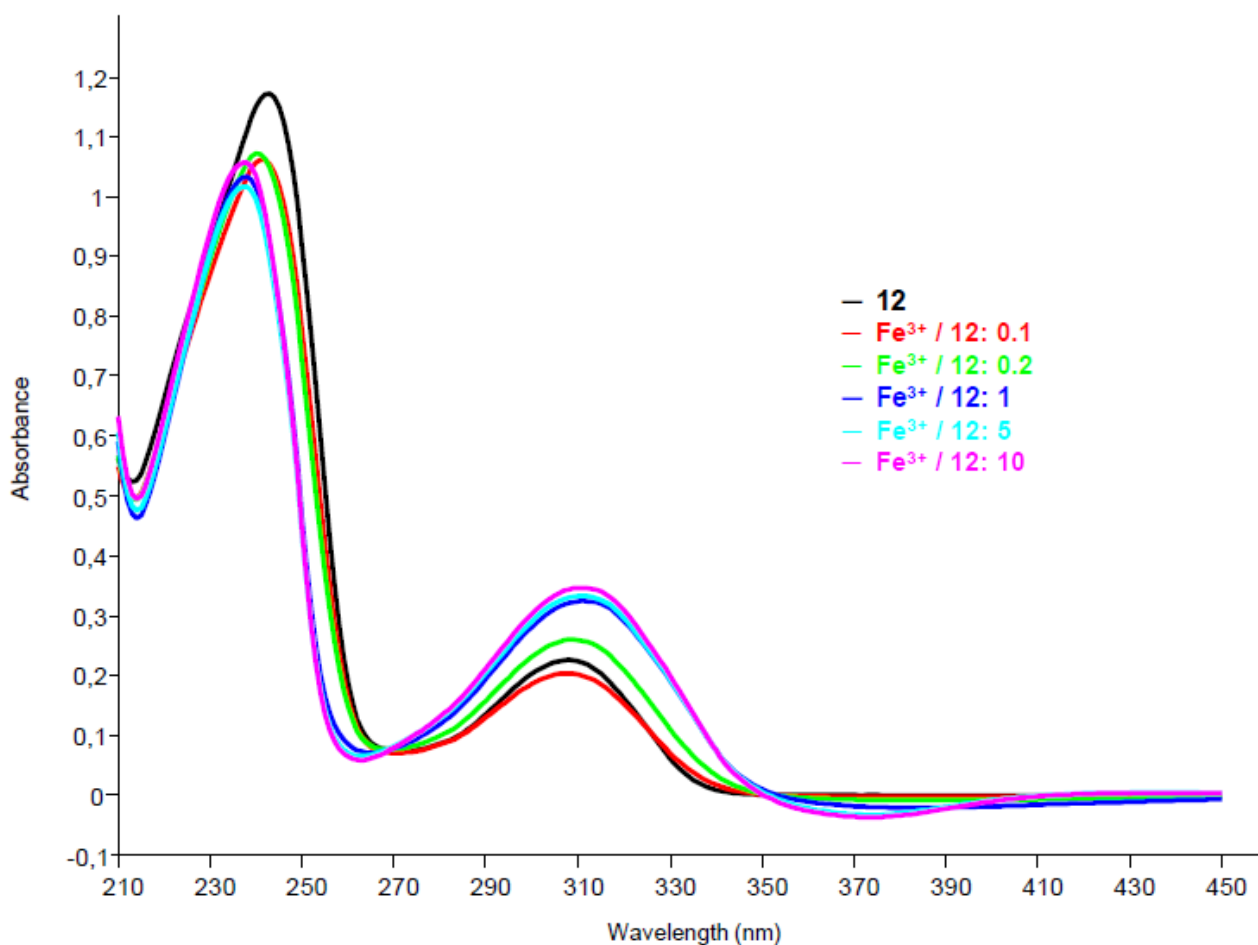

**Figure S8.** UV-Vis titration of ligand **12** with  $\text{Fe}^{3+}$ . The greatest variations in spectra with increasing amount of metal are observed at 251 nm, with a reduction of absorbance, and at 320 nm, with an increase of absorbance. There are two isosbestic points at 267 and 350 nm.

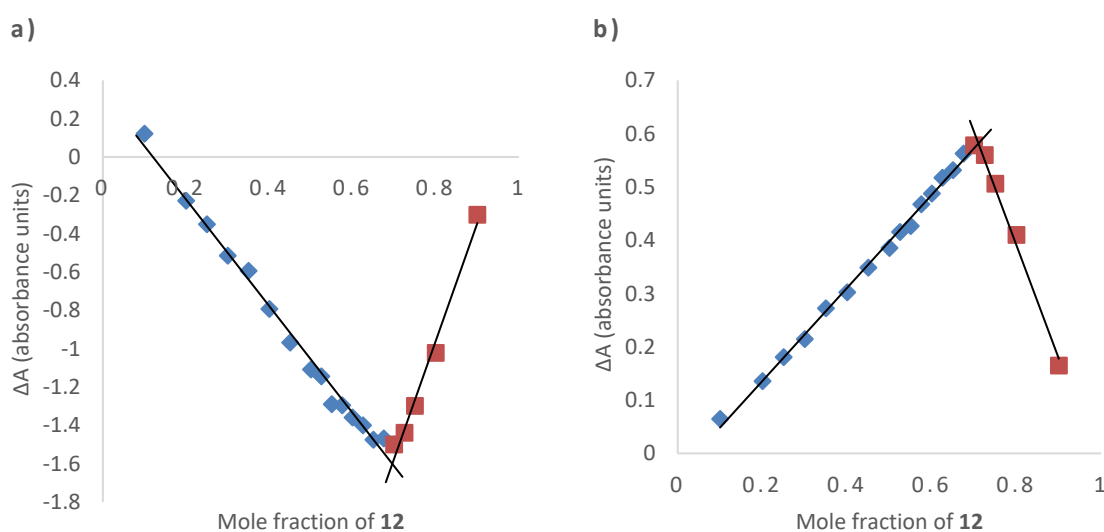

**Figure S9.** Job's plot of compound **12** in presence of  $\text{Fe}^{3+}$ : variation of the absorbance ( $\Delta A$ ) at the wavelength of 251 nm in **a**) or at 320 nm in **b**), in ordinate, versus the mole fraction of **12**, in abscissa. X (mole fraction that causes the maximum variation of absorbance) = 0.69 in **a**), 0.71 in **b**); n (number of ligand molecules per cation) = 2.

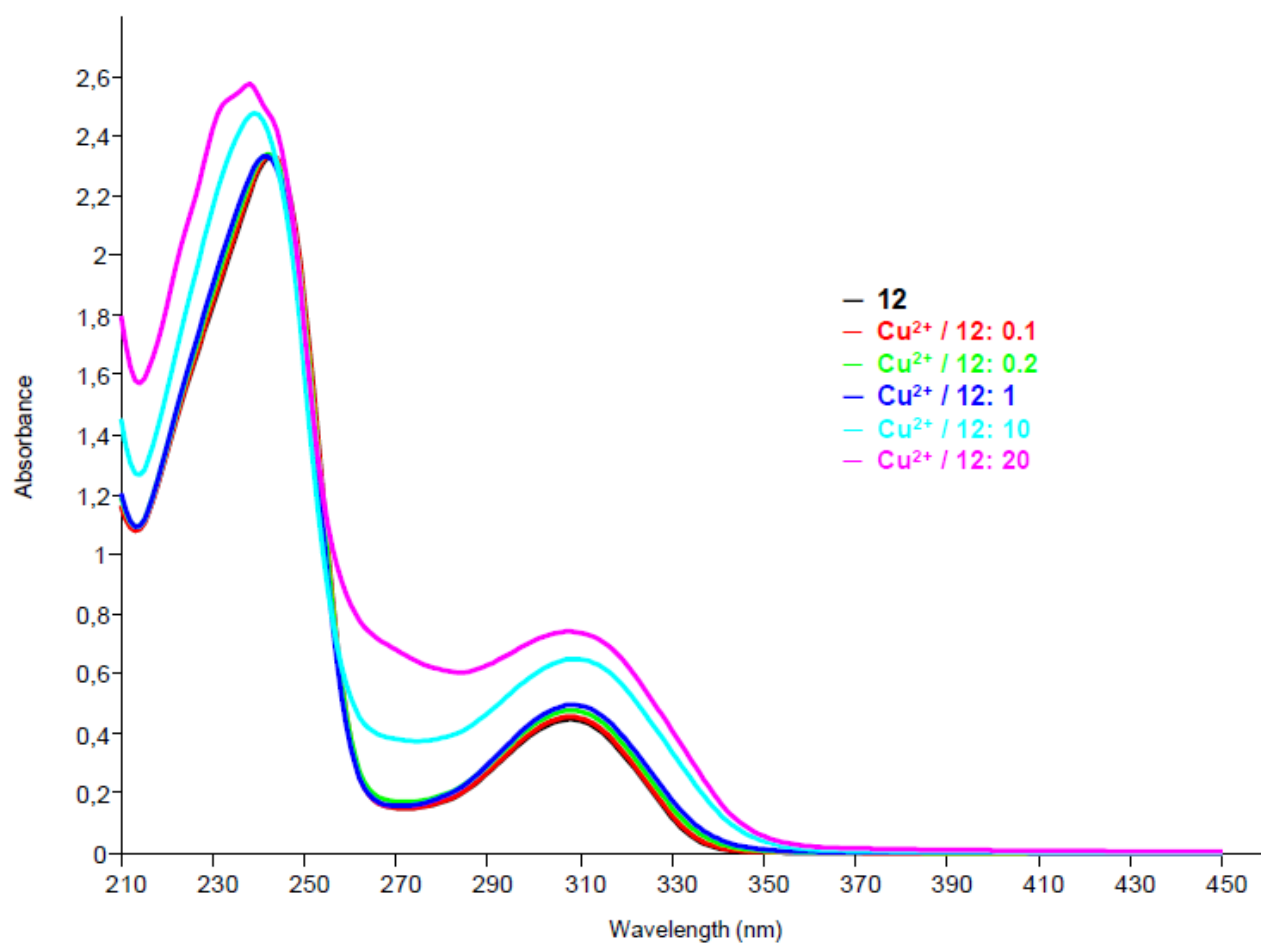

**Figure S10.** UV-Vis titration of ligand **12** with  $\text{Cu}^{2+}$ . The greatest variations in spectra with increasing amount of metal are observed at 235, 270 and 310 nm, with an increase of absorbance.

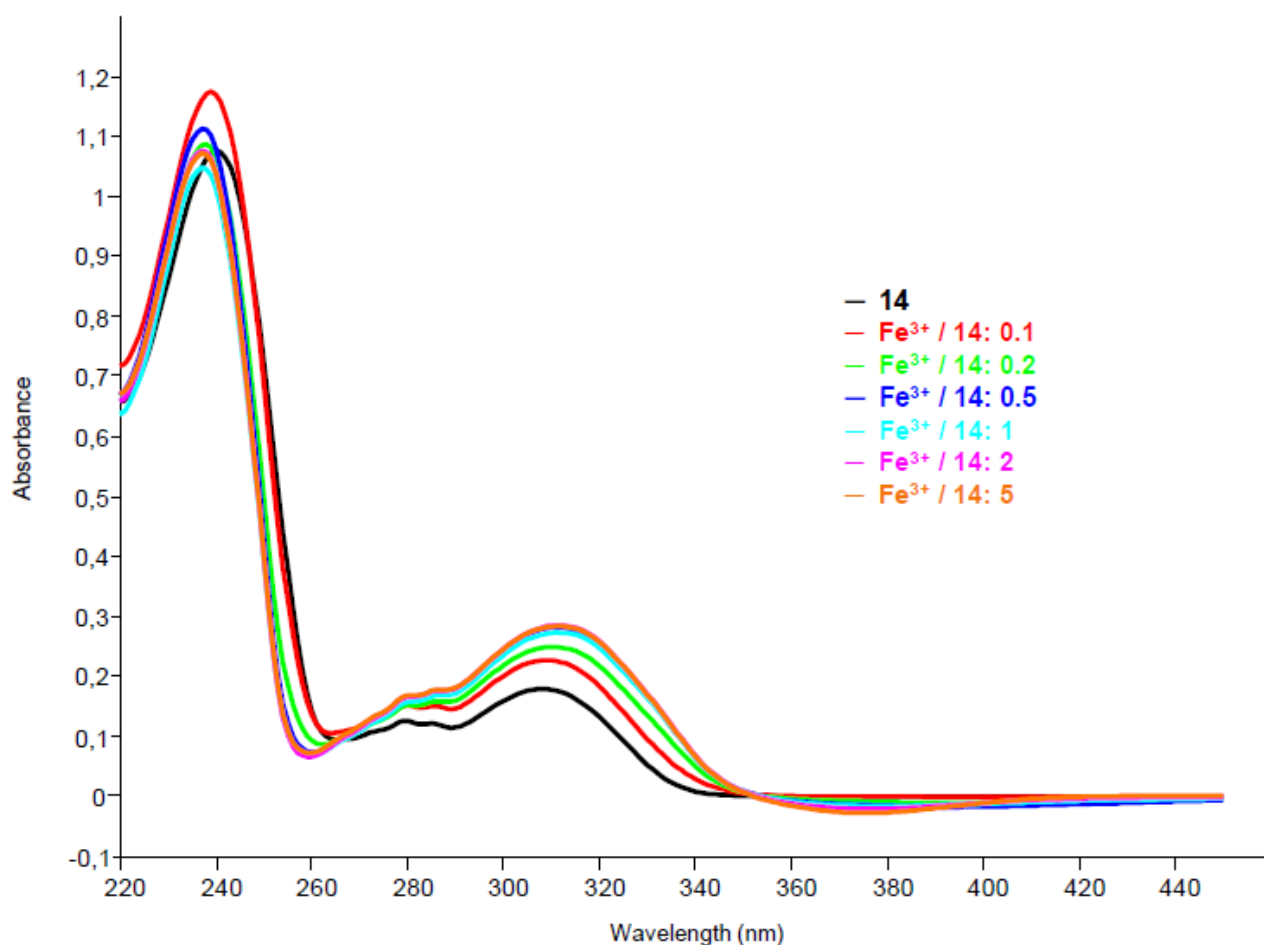

**Figure S11.** UV-Vis titration of ligand **14** with  $\text{Fe}^{3+}$ . The greatest variation in spectra with increasing amount of metal is observed at 310 nm, with an increase of absorbance. There are two isosbestic points at 266 and 350 nm.

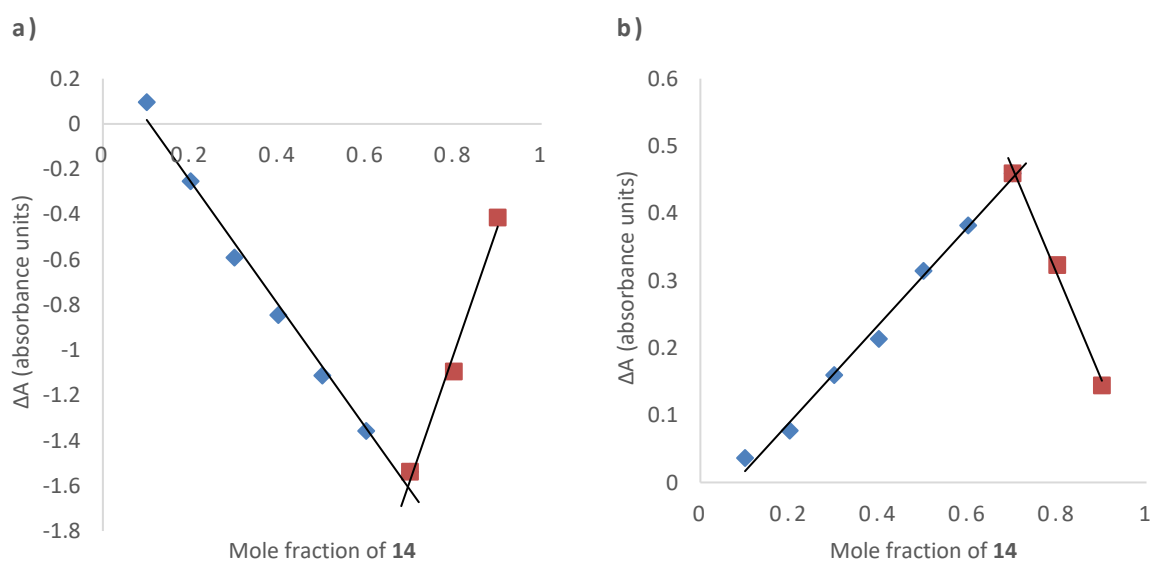

**Figure S12.** Job's plot of compound **14** in presence of  $\text{Fe}^{3+}$ : variation of the absorbance ( $\Delta A$ ) at the wavelength of 250 nm in **a)** or at 310 nm in **b)**, in ordinate, versus the mole fraction of **14**, in abscissa. X (mole fraction that causes the maximum variation of absorbance) = 0.70 in **a)**, 0.71 in **b)**; n (number of ligand molecules per cation) = 2.

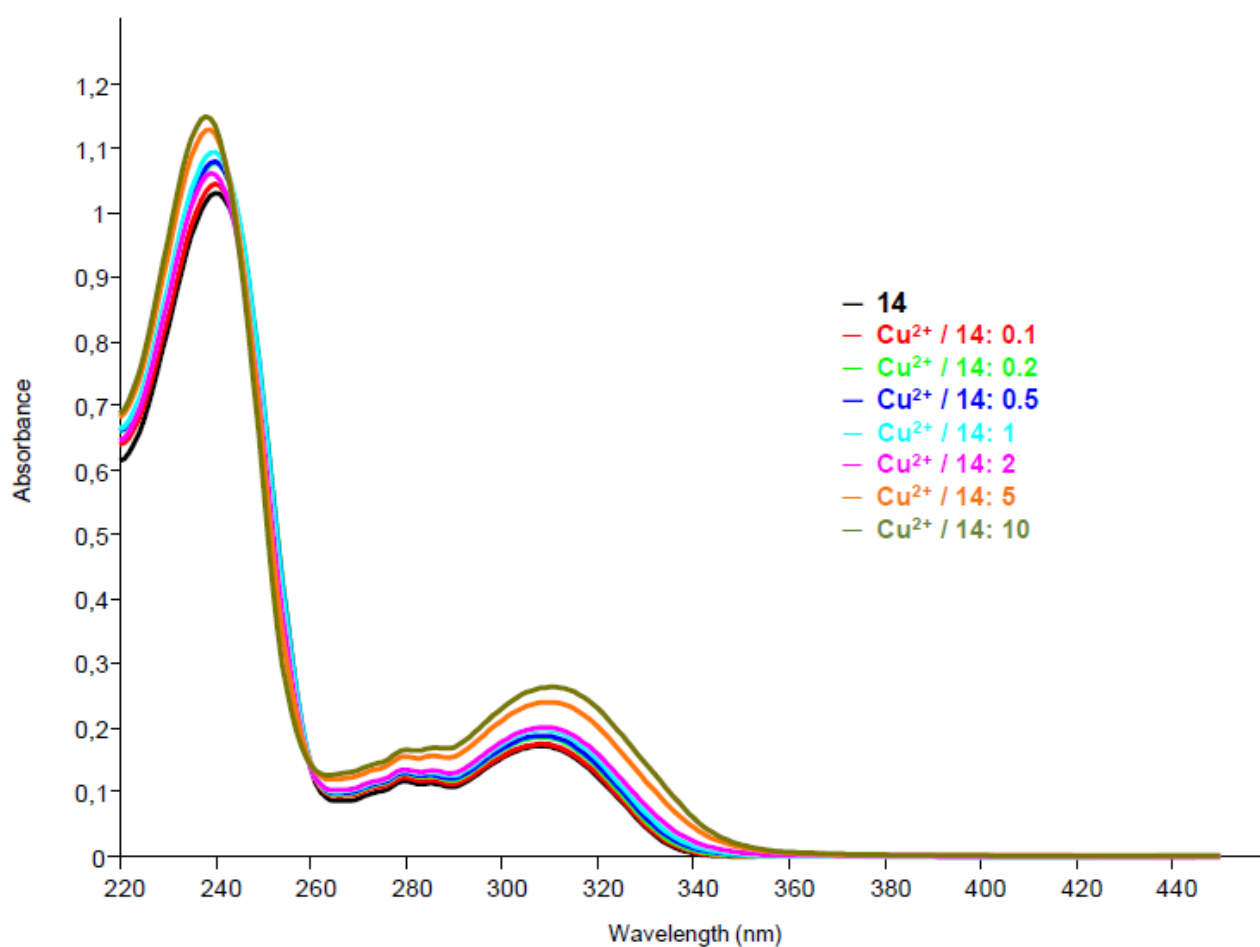

**Figure S13.** UV-Vis titration of ligand **14** with  $\text{Cu}^{2+}$ . The greatest variation in spectra with increasing amount of metal is observed at 310 nm, with an increase of absorbance. There is an isosbestic point at 260 nm.

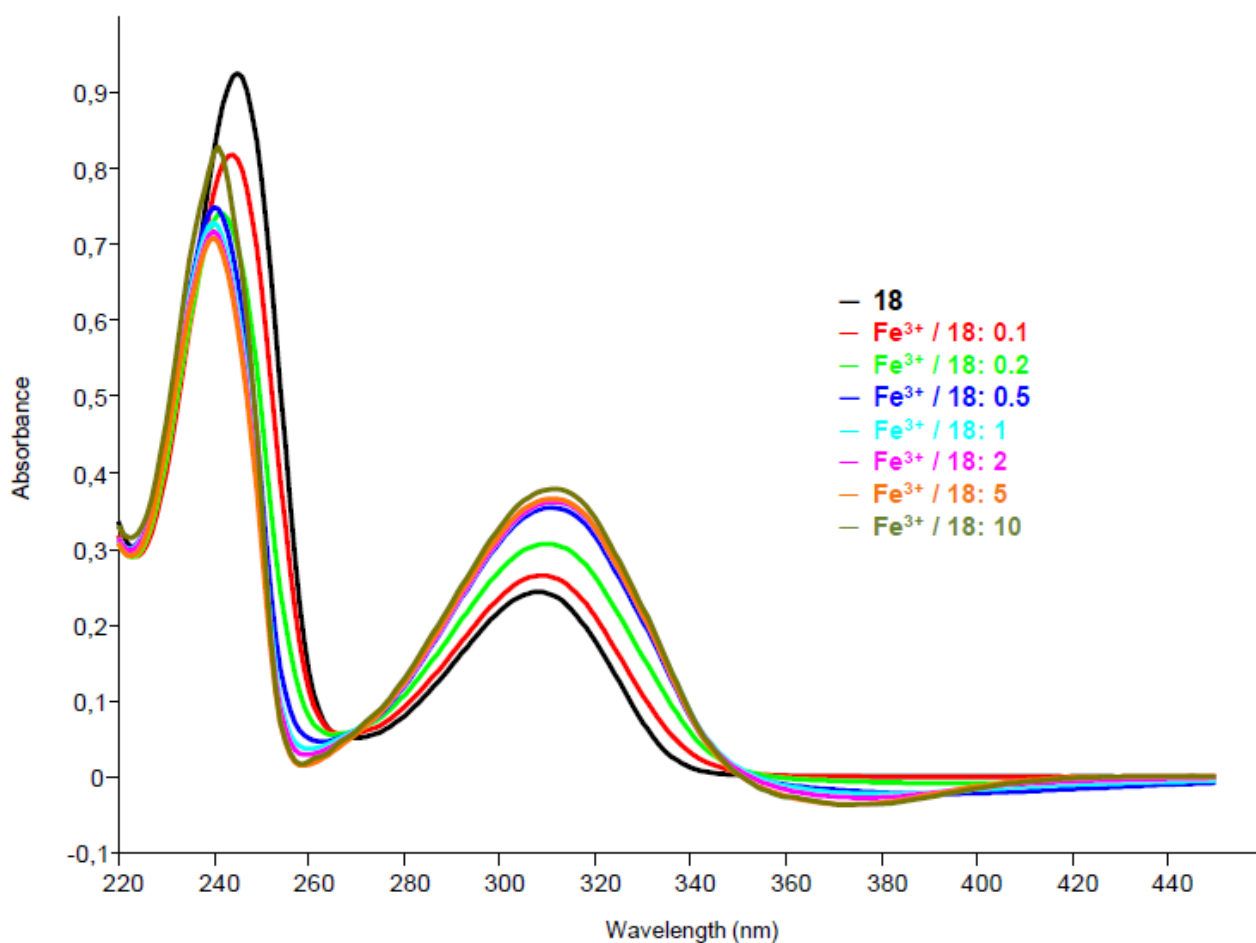

**Figure S14.** UV-Vis titration of ligand **18** with  $\text{Fe}^{3+}$ . The greatest variations in spectra with increasing amount of metal are observed at 245 nm, with a reduction of absorbance, and at 310 nm, with an increase of absorbance. There are two isosbestic points at 267 and 353 nm.

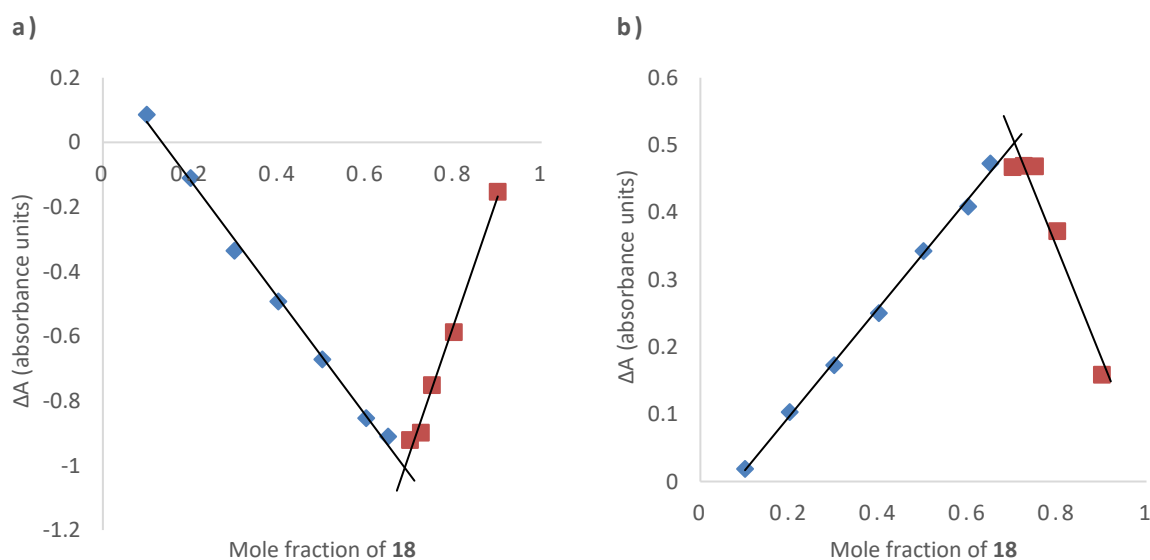

**Figure S15.** Job's plot of compound **18** in presence of  $\text{Fe}^{3+}$ : variation of the absorbance ( $\Delta A$ ) at the wavelength of 245 nm in **a)** or at 310 nm in **b)**, in ordinate, versus the mole fraction of **18**, in abscissa. X (mole fraction that causes the maximum variation of absorbance) = 0.69 in **a)**, 0.70 in **b)**; n (number of ligand molecules per cation) = 2.

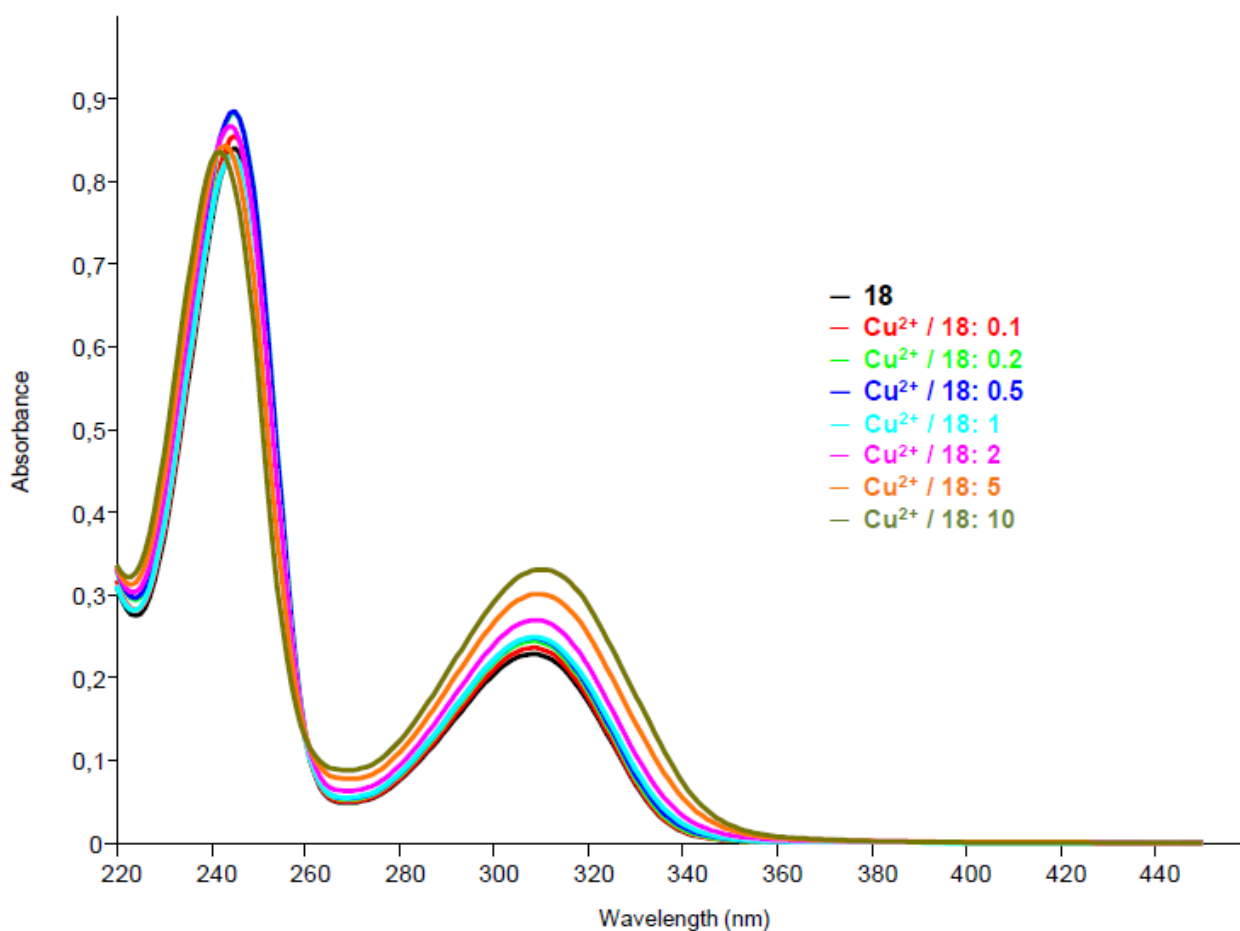

**Figure S16.** UV-Vis titration of ligand **18** with  $\text{Cu}^{2+}$ . The greatest variations in spectra with increasing amount of metal are observed at 270 and 310 nm, with an increase of absorbance. There is an isosbestic point at 261 nm.

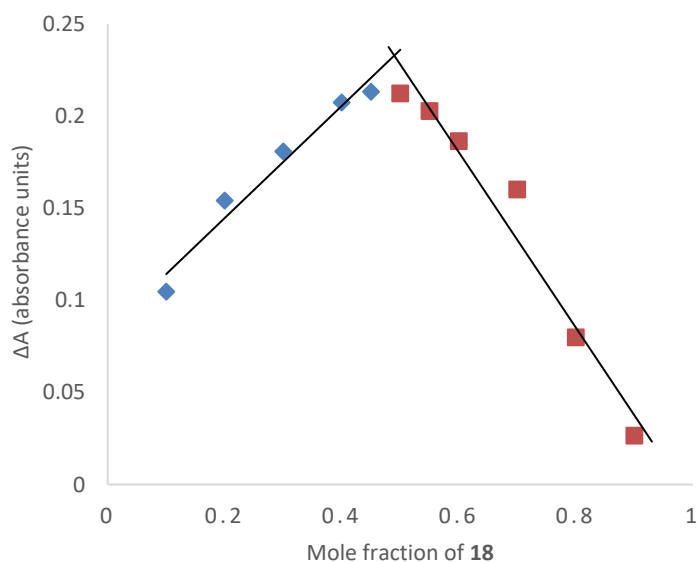

**Figure S17.** Job's plot of compound **18** in presence of  $\text{Cu}^{2+}$ : variation of the absorbance ( $\Delta A$ ) at the wavelength of 330 nm, in ordinate, versus the mole fraction of **18**, in abscissa. X (mole fraction that causes the maximum variation of absorbance) = 0.49; n (number of ligand molecules per cation) = 1.
